# Supplementary material for: Interaction of Glia Cells with Glioblastoma and Melanoma Cells under the Influence of Phytocannabinoids
Source: MDPI journal article supplement (doi:10.3390/cells11010147), 2022-01-03
Supplement: s1 [file s1]

Supplementary Materials:

Table S1. Sample size.

| Experiment / Treatment | LN229 | A375 |
|------------------------|-------|------|
| Single Cell Migration  | 93    | 143  |
| CTL                    | 58    | 76   |
| CBD                    | 60    | 56   |
| THC                    | 112   | 64   |
| THC+CBD                | 106   | 135  |
| ACM                    | 112   | 67   |
| ACM+CBD                | 87    | 97   |
| ACM+THC                | 88    | 51   |
| ACM+THC+CBD            | 83    | 81   |
| BV2CM                  | 42    | 88   |
| BV2CM+CBD              | 42    | 75   |
| BV2CM+THC              | 64    | 67   |
| BV2+THC+CBD            |       |      |
| Collective migration   |       | 28   |
| CTL                    | 24    | 32   |
| CBD                    | 25    | 32   |
| THC                    | 25    | 35   |
| THC+CBD                | 26    | 37   |
| ACM                    | 21    | 38   |
| ACM+CBD                | 19    | 38   |
| ACM+THC                | 22    | 31   |
| ACM+THC+CBD            | 20    | 39   |
| BV2CM                  | 23    | 41   |
| BV2CM+CBD              | 20    | 34   |
| BV2CM+THC              | 23    | 39   |
| BV2+THC+CBD            | 23    |      |
| Aggregation            | 74    | 48   |
| CTL                    | 73    | 46   |
| CBD                    | 78    | 45   |
| THC                    | 69    | 33   |
| THC+CBD                | 39    | 20   |
| 30% A                  | 19    | 10   |
| A+CBD                  | 16    | 9    |
| A+THC                  | 42    | 13   |
| A+THC+CBD              | 30    | 29   |
| 10% MG                 | 14    | 9    |
| MG+CBD                 | 22    | 12   |
| MG+THC                 | 12    | 4    |
| MG+THC+CBD             |       |      |
| Ratio establishment    |       |      |
| 5%MG                   | 23    | 23   |
| 10%MG                  | 19    | 20   |
| 15%MG                  | 14    | 19   |
| 30%MG                  | 10    | 16   |

|      |    |    |
|------|----|----|
| 5%A  | 11 | 15 |
| 10%A | 14 | 14 |
| 15%A | 14 | 12 |
| 30%A | 6  | 8  |

Abbreviations: CTL: control, CBD: cannabidiol, THC: tetrahydrocannabinol, ACM: astrocyte conditioned media, BV2CM: BV2 cell conditioned media, A: astrocytes, MG: microglia, x%: relative proportion of MG or A to total cell number.

**Table S2.** Characteristic spheroid size, aggregation time and aggregation speed.

|            | LN229            |            |                        | A375             |            |                        |
|------------|------------------|------------|------------------------|------------------|------------|------------------------|
|            | $A_0/10^5$ in px | $t_0$ in h | $A_0/10^5/t_0$ in px/h | $A_0/10^5$ in px | $t_0$ in h | $A_0/10^5/t_0$ in px/h |
| CTL        | 1.15             | 4.4        | 0.261                  | 2.68             | 17.6       | 0.152                  |
| CBD        | 1.92             | 4.5        | 0.426                  | 3.08             | 30.2       | 0.102                  |
| THC        | 2.07             | 4.1        | 0.505                  | 2.62             | 17.1       | 0.153                  |
| THC+CBD    | 1.98             | 4.8        | 0.412                  | 2.61             | 21.8       | 0.120                  |
| 30% A      | 0.91             | 4.7        | 0.194                  | 2.75             | 17.1       | 0.161                  |
| A+CBD      | 0.95             | 6.5        | 0.146                  | 2.50             | 20.0       | 0.125                  |
| A+THC      | 1.08             | 4.6        | 0.235                  | 3.62             | 18.8       | 0.193                  |
| A+THC+CBD  | 1.00             | 6.0        | 0.167                  | 2.69             | 17.5       | 0.154                  |
| 10% MG     | 1.33             | 3.7        | 0.359                  | 3.03             | 43.1       | 0.07                   |
| MG+CBD     | 1.27             | 3.7        | 0.343                  | 1.96             | 24.5       | 0.08                   |
| MG+THC     | 1.13             | 4.0        | 0.283                  | 2.05             | 31.7       | 0.06                   |
| MG+THC+CBD | 0.69             | 4.5        | 0.153                  | 1.98             | 20.4       | 0.10                   |

Abbreviations: CTL: control, CBD: cannabidiol, THC: tetrahydrocannabinol, A: astrocytes, MG: microglia, x%: relative proportion of MG or A to total cell number.

**Table S3.** Proliferation index of cells inside of spheroids.

| Treatment  | LN229 |                    |             | A375  |                    |             |
|------------|-------|--------------------|-------------|-------|--------------------|-------------|
|            | Mean  | Standard deviation | Sample Size | Mean  | Standard deviation | Sample Size |
| CTL        | 0.027 | 0.017              | 6           | 0.005 | 0.005              | 9           |
| CBD        | 0.027 | 0.031              | 15          | 0.004 | 0.005              | 4           |
| THC        | 0.026 | 0.013              | 6           | 0.042 | 0.024              | 3           |
| THC+CBD    | 0.048 | 0.013              | 15          | 0.025 | 0.021              | 9           |
| 30% A      | 0.043 | 0.029              | 9           | 0.006 | 0.011              | 6           |
| A+CBD      | 0.053 | 0.021              | 9           | 0.007 | 0.005              | 3           |
| A+THC      | 0.034 | 0.019              | 10          | 0.018 | 0.020              | 15          |
| A+THC+CBD  | 0.037 | 0.016              | 9           | 0.011 | 0.007              | 5           |
| 10% MG     | 0.029 | 0.010              | 3           | 0.015 | 0.017              | 10          |
| MG+CBD     | 0.023 | 0.019              | 22          | 0.007 | 0.010              | 12          |
| MG+THC     | 0.030 | 0.023              | 15          | 0.006 | 0.009              | 14          |
| MG+THC+CBD | 0.012 | 0.015              | 10          | 0.012 | 0.015              | 13          |

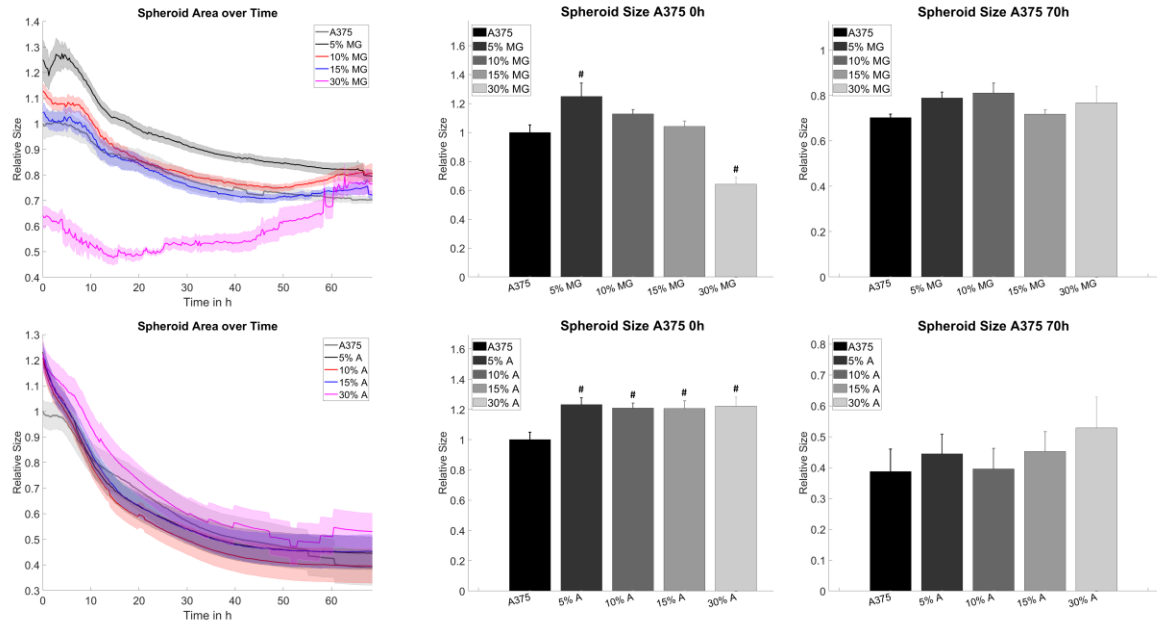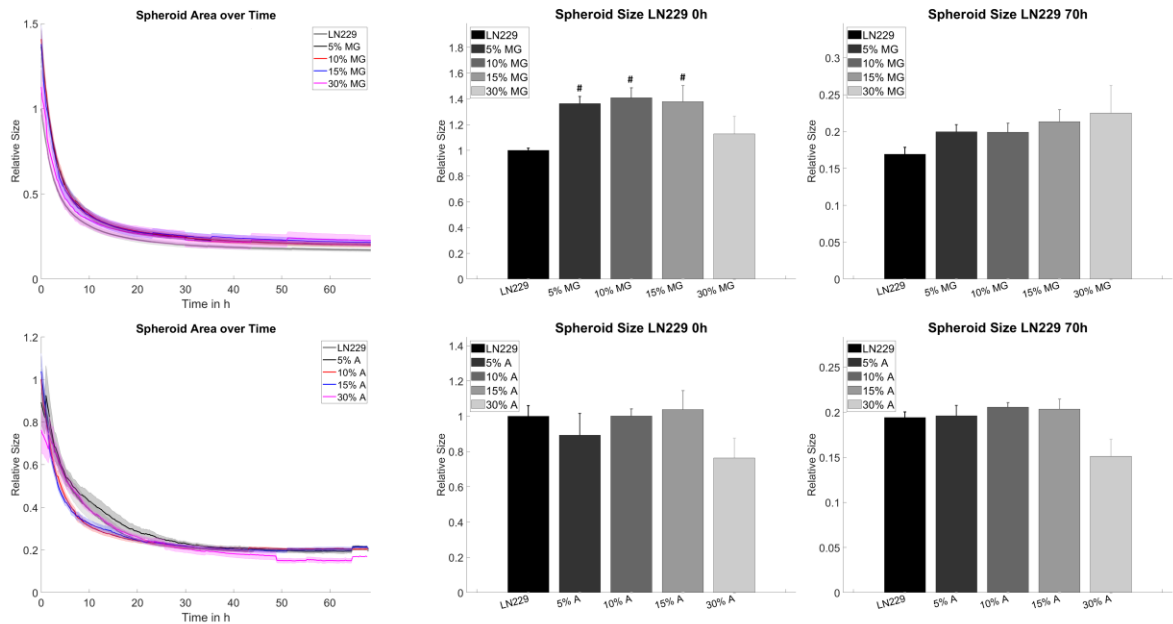

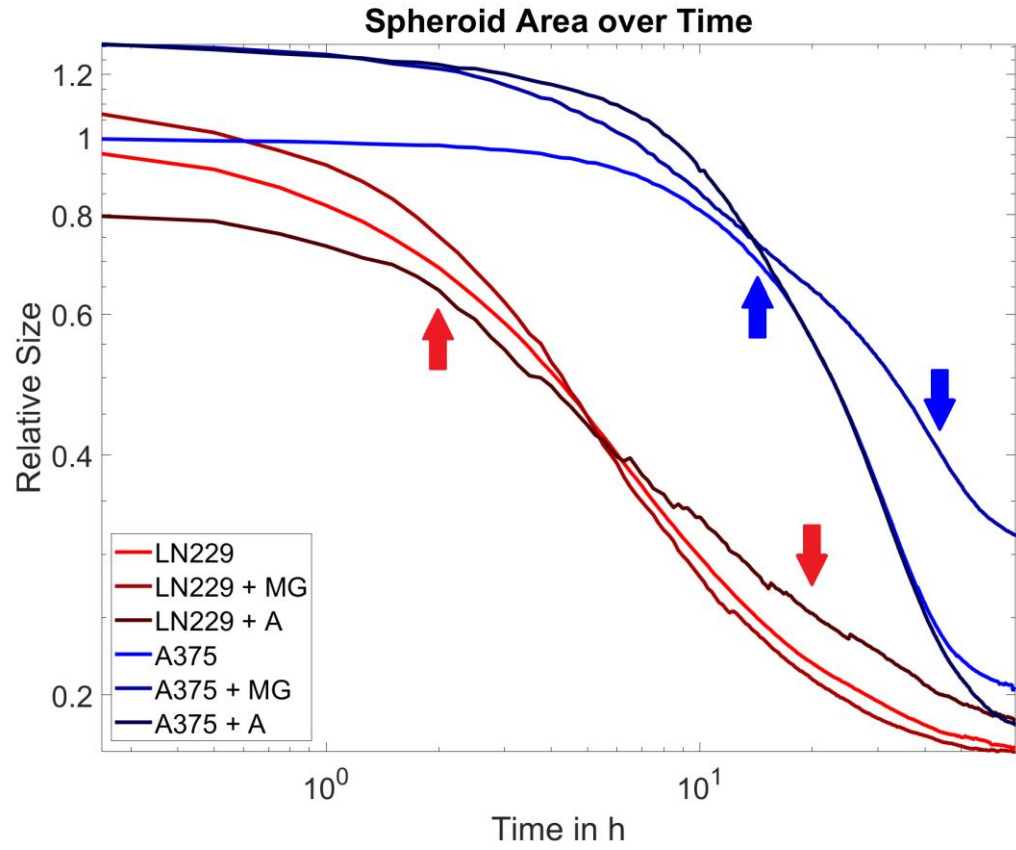

**Figure S3: Spheroid aggregation dynamics.** Log-Log-plot of the relative spheroid size as a function of time. The arrows indicate the start and end time used for fitting the exponential decay, to characterize spheroid aggregation speed. For LN229 cells it corresponds to 2-20 h and for A375 cells to 15-45 h. Abbreviations: A: astrocytes, MG: microglia.

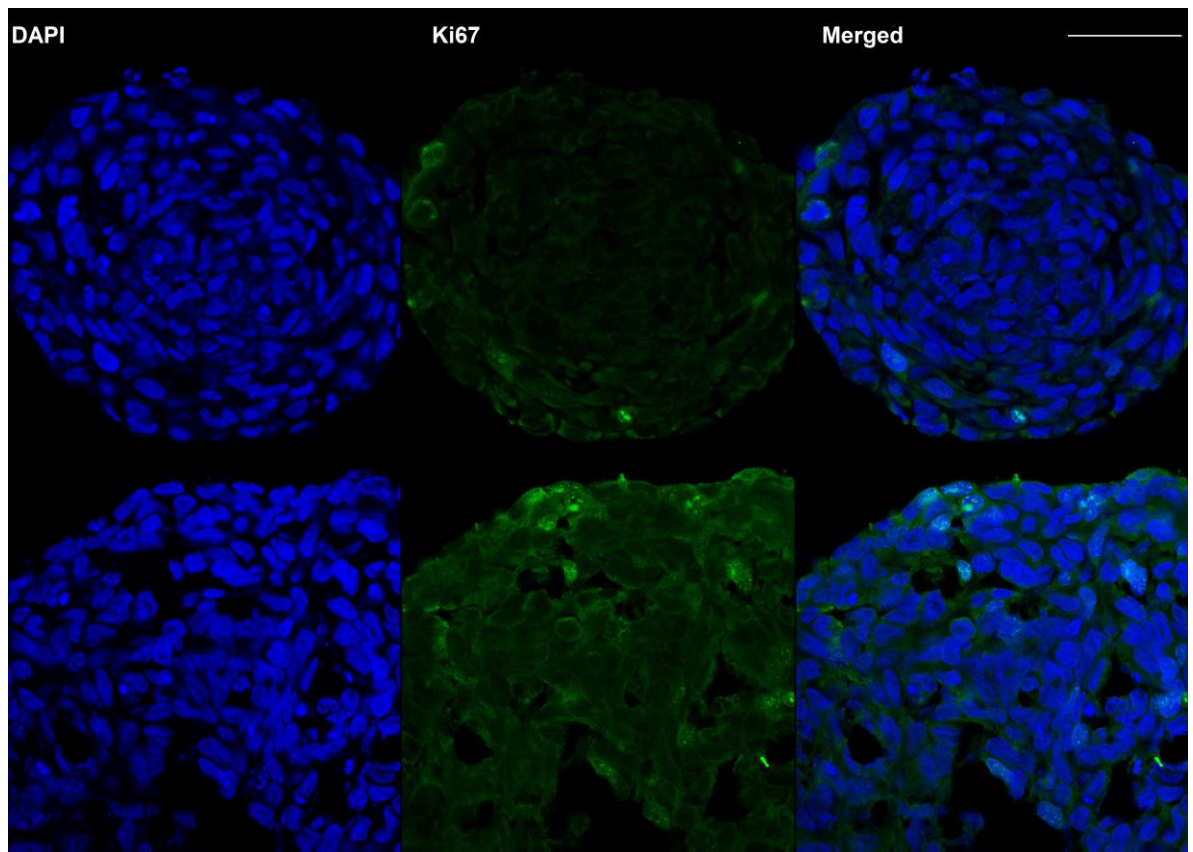

**Figure S4: Representative labelings of sectioned spheroids for analysis of proliferation.** For both image series DAPI is labeled in blue and the proliferation marker Ki67 is labeled in green. Please denote the very low number of Ki67 positive nuclei. The scale bar depicts 50  $\mu\text{m}$ .

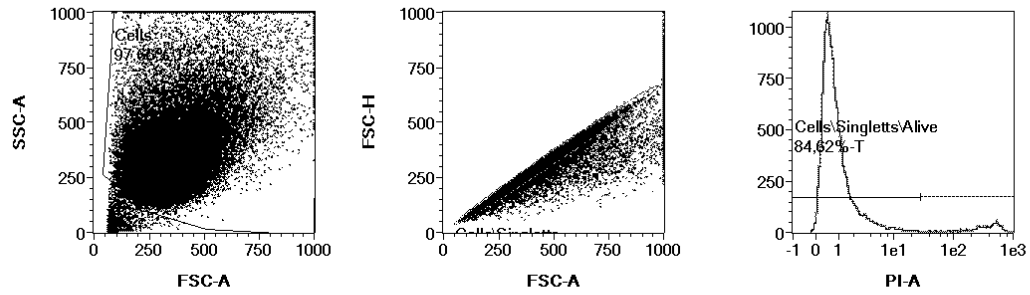

### (a) A375 and astrocytes

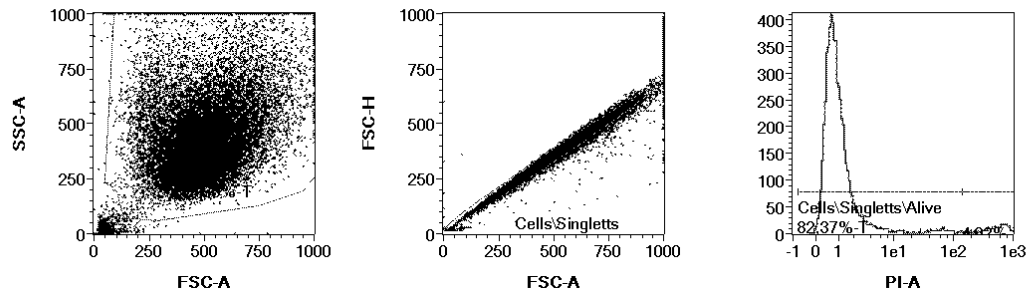

### (b) A375 and microglia

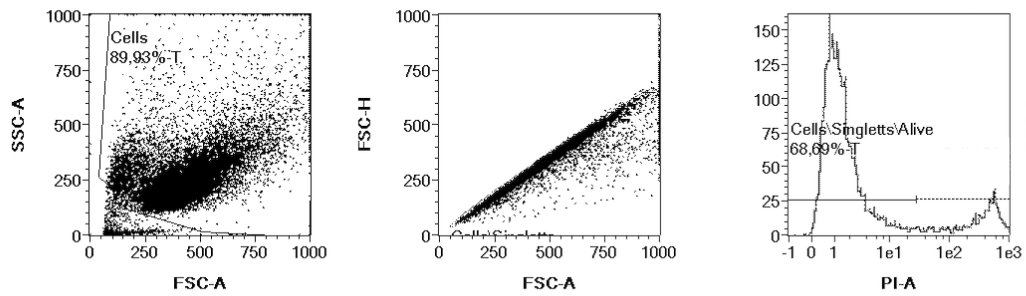

### (c) LN229 and astrocytes

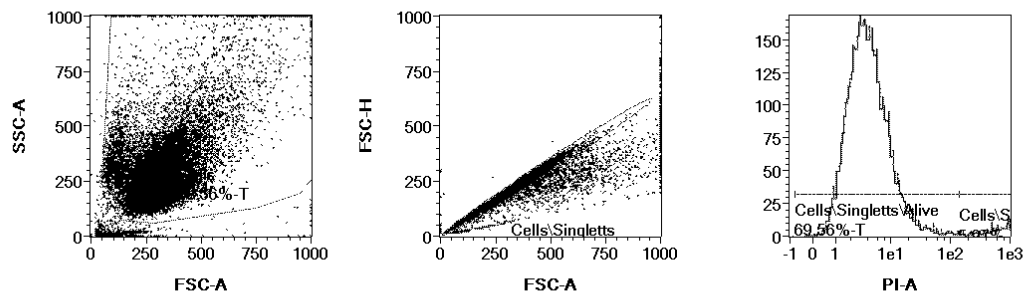

### (d) LN229 and microglia

**Figure S5: Gating strategy.** This figure illustrates the gating strategy for identification of cells (first row), doublets (second row), and propidium iodide positive and negative cells (third row), for A375 cells co-cultured with astrocytes (a) or microglia (b) and LN229 cells co-cultured with astrocytes (c) and microglia (d).
